# Supplementary material for: Structural Specificity of Polymorphic Forms of α-Synuclein Amyloid
Source: MDPI journal article supplement (doi:10.3390/biomedicines11051324), 2023-04-29
Supplement: s1 [file s1]

## SUPPLEMENTARY MATERIALS

**Table S1.** RD i K values for individual chains. To define the part of the structuralisation micelle-like some residues (of high difference between Ti and Oi) got eliminated from Ti and Oi calculation. Dispersed – residues of high differences between Ti and Oi dispersed all over the chain – the procedure of elimination does not solve the problem. Highly dispersed – example of high degree of disorder (FOD-model criteria). The order of proteins – as in Table 1.

| PDB ID | CHAINS | FRAGMENT | Individual chain |     | Residues eliminated |     |                                  |
|--------|--------|----------|------------------|-----|---------------------|-----|----------------------------------|
|        |        |          | RD               | K   | RD                  | K   | FRAGMENT                         |
| 6CU8   | E      | 43-83    | 0.384            | 0.2 |                     |     |                                  |
| 6RTB   | C      | 36-98    | 0.438            | 0.3 |                     |     |                                  |
| 6UFR   | A      | 36-99    | 0.453            | 0.3 |                     |     |                                  |
| 7L7H   | B      | 61-98    | 0.463            | 0.3 |                     |     |                                  |
| 7NCI   | C      | 37-97    | 0.468            | 0.3 |                     |     |                                  |
| 6SST   | C      | 14-96    | 0.484            | 0.3 |                     |     |                                  |
| 7LC9   | I      | 46-96    | 0.487            | 0.3 |                     |     |                                  |
| 6SSX   | C      | 14-97    | 0.490            | 0.3 |                     |     |                                  |
| 7NCJ   | C      | 14-96    | 0.496            | 0.4 |                     |     |                                  |
| 6RT0   | A      | 37-97    | 0.501            | 0.4 |                     |     |                                  |
| 7NCA   | D      | 37-97    | 0.502            | 0.4 |                     |     |                                  |
| 6A6B   | C      | 38-97    | 0.511            | 0.3 | 0.370               | 0.0 | 37-42                            |
| 7NCG   | A      | 14-91    | 0.516            | 0.4 | 0.473               | 0.3 | 14-21                            |
| 6L4S   | A      | 46-96    | 0.517            | 0.4 | 0.471               | 0.3 | 47-49                            |
| 7NCH   | C      | 14-91    | 0.518            | 0.4 | 0.473               | 0.3 | 14-20                            |
| 6XYO   | B      | 21-99    | 0.526            | 0.4 | 0.474               | 0.3 | 43-46                            |
| 6H6B   | E      | 37-97    | 0.540            | 0.4 | 0.490               | 0.3 | 44-94                            |
| 6OSL   | E      | 37-96    | 0.540            | 0.4 | 0.435               | 0.2 | N-TERMINAL                       |
| 6OSJ   | E      | 39-97    | 0.547            | 0.4 | 0.486               | 0.3 | N-TERMINAL                       |
| 7E0F   | B      | 37-99    | 0.551            | 0.6 | 0.485               | 0.7 | DISPERSED                        |
| 6LRQ   | B      | 37-99    | 0.553            | 0.4 | 0.435               | 0.2 | 43-99                            |
| 6FLT   | E      | 38-95    | 0.565            | 0.4 | 0.491               | 0.3 | 43-93                            |
| 6XYP   | B      | 36-99    | 0.569            | 0.5 | 0.410               | 0.1 | 36-42                            |
| 6PEO   | A      | 36-99    | 0.581            | 0.4 | 0.422               | 0.2 | 38-42                            |
| 6XYQ   | B      | 36-99    | 0.584            | 0.4 | 0.419               | 0.1 | 36-42                            |
| 6PES   | A      | 14-94    | 0.584            | 0.5 | 0.425               | 0.2 | 36-43                            |
| 7NCK   | C      | 9-93     | 0.585            | 0.4 | 0.416               | 0.4 | 38-42                            |
| 6CU7   | D      | 43-83    | 0.599            | 0.5 | 0.497               | 0.3 | 38-42                            |
| 6OSM   | E      | 38-95    | 0.606            | 0.4 | 0.432               | 0.2 | N-TERMINAL                       |
| 6L1T   | C      | 1-100    | 0.650            | 1.0 |                     |     | HIGHLY DISPERSED                 |
| 7C1D   | A      | 37-97    | 0.702            | 0.7 | 0.455               | 0.2 | N-TERMINAL                       |
| 7LC9   | C      | 46-98    | 0.710            | 1.1 | 0.497               | 0.4 | DISPERSED                        |
| 6XYP   | A      | 14-94    | 0.719            | 1.0 | 0.491               | 0.3 | 14-20,25-31,39,43-46,79,80,93,94 |
| 6XYO   | A      | 14-94    | 0.720            | 1.2 |                     |     | HIGHLY DISPERSED                 |
| 6XYQ   | A      | 14-94    | 0.721            | 1.0 | 0.497               | 0.3 | 12-19+DISPERSED                  |
| 2N0A   | B      | 1-140    | 0.718            | 1.4 | 0.495               | 0.4 | 35-99                            |

**Table S2.** Values of RD i K as calculated for proto-fibrils. The values given in bold – the nmicelle-like construction (RD<0.5). The right column – the fragment truncated. No – denotes absence of following residues.

| PDB ID | CHAINS  | FRAGMENT | Proto-fibril |     | Residues eliminated |     |                                                |
|--------|---------|----------|--------------|-----|---------------------|-----|------------------------------------------------|
|        |         |          | RD           | K   | RD                  | K   | Fragment No - eliminated                       |
| 6CU8   | A-I     | 43-83    | 0.458        | 0.3 |                     |     |                                                |
| 6RTB   | A-E     | 9-93     | 0.489        | 0.3 |                     |     |                                                |
| 6URF   | ADEHI   | 36-98    | 0.453        | 0.3 |                     |     |                                                |
| 7L7H   | A-D     | 36-79    | 0.495        | 0.4 |                     |     |                                                |
| 7NCI   | A-F     | 14-91    | 0.452        | 0.3 |                     |     |                                                |
| 6SST   | A-E     | 14-96    | 0.508        | 0.4 | 0.489               | 0.4 | 20-96                                          |
| 7LC9   | ABCDEFG | 46-96    | 0.669        | 1.1 | 0.474               | 0.4 | 58,61,65-69,75,78,80                           |
| 6SSX   | A-E     | 14-96    | 0.496        | 0.4 |                     |     |                                                |
| 7NCJ   | A-F     | 37-97    | 0.461        | 0.3 |                     |     | 37-97                                          |
| 6RT0   | A-E     | 14-97    | 0.506        | 0.4 | 0.493               | 0.4 | 20-97                                          |
| 7NCA   | AEFJKL  | 37-97    | 0.481        | 0.4 |                     |     |                                                |
| 6A6B   | A-F     | 37-99    | 0.538        | 0.4 | 0.392               | 0.1 | 44-99                                          |
| 7NCG   | AEFJKL  | 37-97    | 0.483        | 0.4 |                     |     | 37-97                                          |
| 6L4S   | ACE     | 45-99    | 0.547        | 0.5 | 0.499               | 0.4 | 20-24,43,51-56,32-35,38-40,84-88               |
| 7NCH   | A-F     | 14-91    | 0.472        | 0.4 |                     |     |                                                |
| 6XYO   | BDFHJ   | 21-99    | 0.541        | 0.5 | 0.497               | 0.4 | 21-99 NO 43-46,80                              |
| 6H6B   | A-H     | 38-95    | 0.572        | 0.5 | 0.472               | 0.3 | 42-91                                          |
| 6OSL   | ACEGI   | 39-97    | 0.549        | 0.4 | 0.428               | 0.2 | 42-97                                          |
| 6OSJ   | ACEGI   | 37-97    | 0.570        | 0.5 | 0.480               | 0.3 | 43-97                                          |
| 7E0F   | A-C     | 50-98    | 0.544        | 0.5 | 0.496               | 0.4 | 52-57,77,82                                    |
| 6LRQ   | A-C     | 37-99    | 0.571        | 0.5 | 0.454               | 0.3 | 43-99                                          |
| 6FLT   | A-I     | 38-95    | 0.600        | 0.6 | 0.482               | 0.3 | 43-92                                          |
| 6XYP   | BDFHJ   | 36-99    | 0.581        | 0.5 | 0.425               | 0.3 | 43-99                                          |
| 6PEO   | A-E     | 36-99    | 0.581        | 0.6 | 0.425               | 0.1 | 43-99 NO 45,46,50,80                           |
| 6XYQ   | BDFHJ   | 36-99    | 0.585        | 0.5 | 0.410               | 0.1 | 43-99                                          |
| 6PES   | A-E     | 36-99    | 0.582        | 0.6 | 0.430               | 0.2 | 43-94                                          |
| 7NCK   | A-F     | 37-97    | 0.548        | 0.5 | 0.414               | 0.2 | 44-97                                          |
| 6CU7   | A-I     | 38-97    | 0.663        | 1.0 | 0.499               | 0.4 | 38-41,45,46,58,66-69,81,82,84-86,93,94         |
| 6OSM   | ACEGI   | 37-96    | 0.607        | 0.5 | 0.416               | 0.2 | 42-92                                          |
| 6L1T   | A-E     | 1-100    | 0.657        | 1.2 | 0.462               | 0.3 |                                                |
| 7C1D   | ABE     | 46-96    | 0.653        | 0.8 | 0.403               | 0.3 | 50-80,83-99                                    |
| 7LC9   | FHIJK   | 61-98    | 0.490        | 0.3 |                     |     |                                                |
| 6XYP   | ACGEI   | 14-94    | 0.704        | 1.3 | 0.493               | 0.4 | 32-90 NO 43-46,34,35,78-80,54-56               |
| 6XYO   | ACEGI   | 14-94    | 0.706        | 1.4 | 0.491               | 0.3 | 21-93 NO 24-27, 32-35, 43to46. 51-56. 79,80,83 |
| 6XYQ   | ACEGI   | 14-94    | 0.707        | 1.3 | 0.498               | 0.3 | 32-90 NO 43-46 and 52-55                       |
| 2N0A   |         | 1-140    | 0.472        | 0.3 | 0.473               | 0.4 | 1-42, 101-140*                                 |
| 2N0A   |         | 38-100   | 0.492        | 0.3 |                     |     |                                                |

**Table S3.** Values of RD and K for super-fibrils. The order of proteins as in Table 1.

| Super-fibril |                 |       |     | Truncated Super-fibril |     |                                           |
|--------------|-----------------|-------|-----|------------------------|-----|-------------------------------------------|
| PDB ID       | Fragment        | RD    | K   | RD                     | K   | Fragment eliminated                       |
| 6CU8         | 43-83           | 0.437 | 0.3 |                        |     |                                           |
| 6RTB         | 36-98           | 0.738 | 2.1 |                        |     |                                           |
| 6UFR         | 36-99           | 0.673 | 1.1 | 0.423                  | 0.2 |                                           |
| 7L7H         | 36-79           | 0.808 | 4.4 |                        |     |                                           |
| 7NCI         | 37-97           | 0.744 | 1.8 | 0.483                  | 0.4 | No 14-20,42-46,50,81-97                   |
| 6SST         | 14-96           | 0.757 | 2.0 |                        |     |                                           |
| 7LC9         | 50-98/<br>46-96 | 0.660 | 1.1 |                        |     | Dispersed                                 |
| 6SSX         | 14-97           | 0.689 | 1.3 | 0.490                  | 0.3 | No 26-35,42-48,50,51,60,62-70,80,82,84-97 |
| 7NCJ         | 14-96           | 0.715 | 1.6 | 0.475                  | 0.4 | 14-19,43-46,81-97                         |
| 6RT0         | 37-97           | 0.691 | 1.3 | 0.480                  | 0.3 | No 14-20,36-40,84-97                      |
| 7NCA         | 37-97           | 0.703 | 1.3 | 0.490                  |     | No 37-43,81-95                            |
| 6A6B         | 38-97           | 0.663 | 0.9 | 0.493                  | 0.4 | 37-42,66-71,93,94                         |
| 7NCG         | 14-91           | 0.758 | 1.9 | 0.492                  | 0.5 | No 42-46,81-97                            |
| 6L4S         | 46-96           | 0.620 | 0.7 | 0.433                  | 0.3 | 45-58,60,61,<br>75,79,80,84-86            |
| 7NCH         | 14-91           | 0.672 | 1.1 | 0.498                  | 0.3 | No 14-19,37,40,81,82,84-91                |
| 6XYO         | 14-94           | 0.711 | 1.7 | 0.495                  | 0   | No 42-46, 63-71,50,95                     |
| 6H6B         | 37-97           | 0.750 | 1.6 | 0.467                  | 0.2 | No 86-96 37-44,67-70,81-84                |
| 6OSL         | 37-96           | 0.697 | 1.1 | 0.481                  | 0.3 | No 37-41,65-70,63,75,81,84,85,91          |
| 6OSJ         | 39-97           | 0.704 | 1.2 | 0.494                  | 0.4 | No 37-41, 92-97,65-69, 53,54,57,58,75,91  |
| 7E0F         | 37-99           | 0.633 | 0.8 | 0.497                  | 0.4 | 50-57,68,75, 79,80,82,92                  |
| 6LRQ         | 37-99           | 0.765 | 2.9 |                        |     |                                           |
| 6FLT         | 38-95           | 0.770 | 1.8 | 0.431                  | 0.2 | No 38-42, 63-71, 81-94                    |
| 6XYP         | 14-94           | 0.729 | 1.6 | 0.487                  | 0.4 | No 14-33,43-46,50,65-70,                  |
| 6XYQ         | 14-94/36-99     | 0.731 | 1.6 | 0.499                  | 0.4 | No 29-31,35,38-46,50,65-67,70,80,89-C     |
| 6PES         | 14-94           | 0.769 | 2.9 |                        |     |                                           |
| 6CU7         | 43-97           | 0.706 | 1.3 | 0.434                  | 0.2 | 43- 95 No 64-70, 81,82,84,86,91-95        |
| 6OSM         | 38-95           | 0.731 | 1.4 | 0.478                  | 0.3 | No 37-42,50,57,58,66-69,82,85,88-96       |
| 6LIT         | 1-100           | 0.776 | 2.2 |                        |     |                                           |
| 7C1D         | 37-97           | 0.746 | 1.2 | 0.484                  | 0.4 | No 46-58,79,80,84-87                      |
